# Supplementary material for: Artificial Light-at-Night Exposure and Overweight and Obesity across GDP Levels among Chinese Children and Adolescents
Source: MDPI journal article supplement (doi:10.3390/nu15040939), 2023-02-13
Supplement: s1 [file s1]

## **Artificial light-at-night exposure and overweight and obesity across GDP levels among Chinese children and adolescents**

**Figure S1.** Distribution of prevalence of overweight and obesity and ALAN exposure in China. **(a)** Prevalence of overweight and obesity on the basis of ALAN-area; **(b)** prevalence of overweight and obesity on the basis of ALAN-intensity.

**Figure S2.** Adjusted ORs between ALAN indicators and overweight and obesity across strata of GDP per capita. **(a)** ALAN-area and overweight and obesity; **(b)** ALAN-intensity and overweight and obesity.

**Table S1.** Associations between ALAN indicators and overweight and obesity across tertiles of GDP per capita.

**Table S2.** Associations between ALAN indicators and overweight and obesity across strata of GDP per capita.

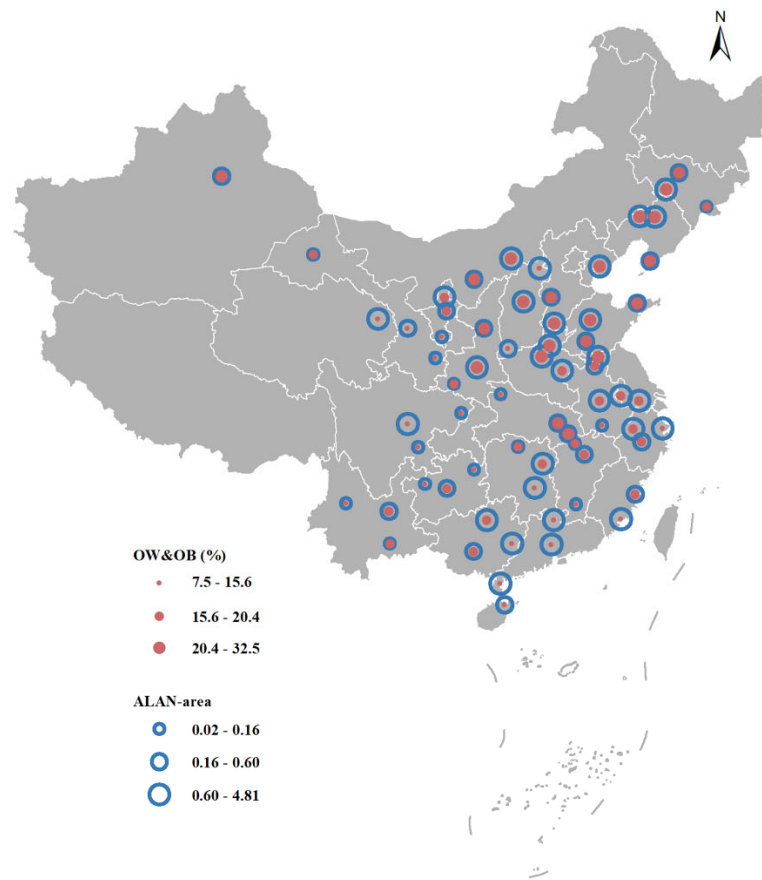

(a)

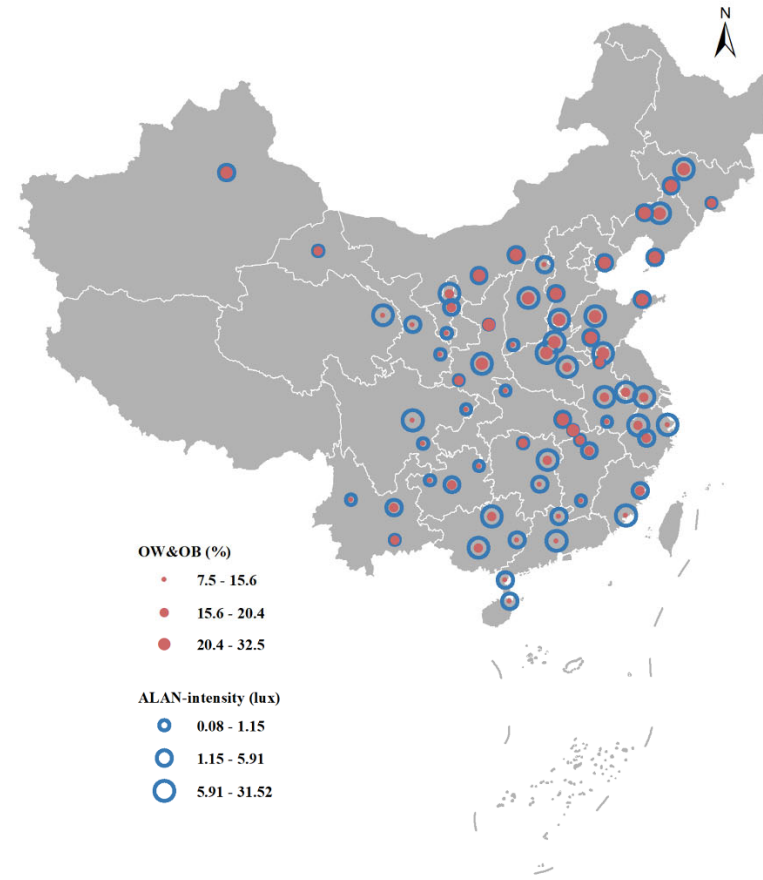

(b)

**Figure S1.** Distribution of prevalence of overweight and obesity and ALAN exposure in China. (a) Prevalence of overweight and obesity on the basis of ALAN-area; (b) prevalence of overweight and obesity on the basis of ALAN-intensity; OW: overweight; OB: obesity; ALAN: artificial light-at-night.

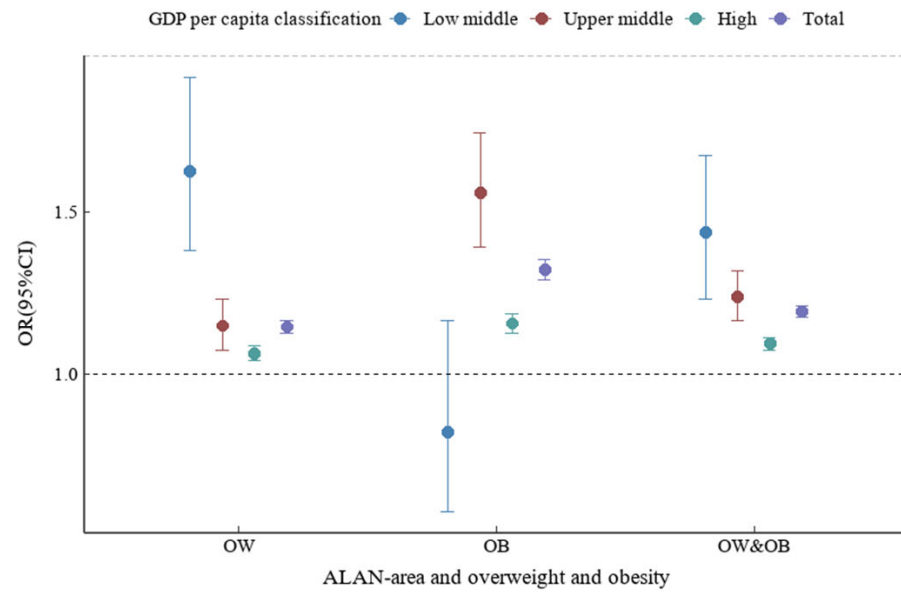

(a)

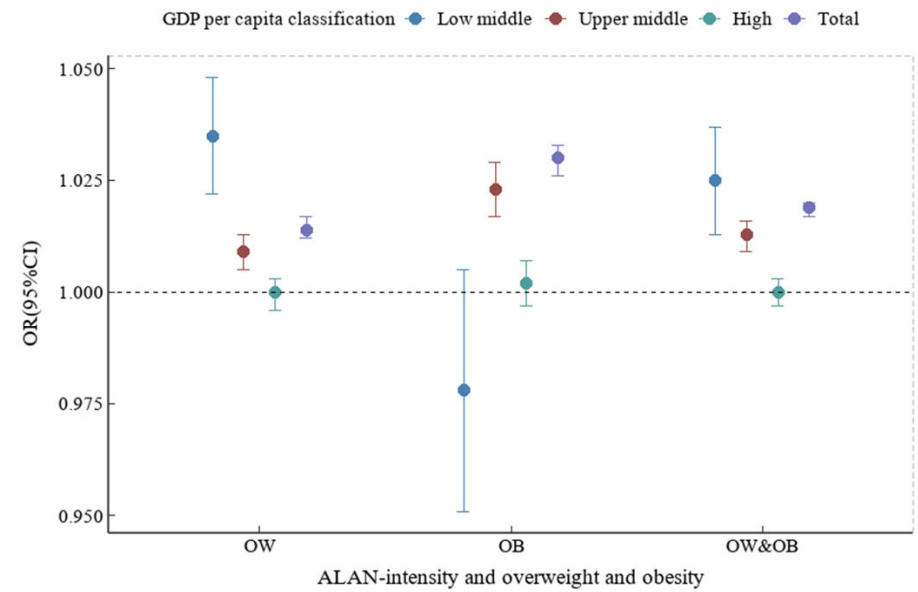

(b)

**Figure S2.** Adjusted ORs between ALAN indicators and overweight and obesity for different strata of GDP per capita. **(a)** ALAN-area and overweight and obesity; **(b)** ALAN-intensity and overweight and obesity. Models were adjusted for the fixed effect of age, sex, residence, sleep duration, exercise time, screen time, breakfast, eggs and milk intake, city-level population, and the clustering effect of school. Classification of Regional gross domestic product per capita (US\$): low middle income = (1,036–4,085); upper middle income = (4,086–12,616); High income >12,616. ALAN: artificial light-at-night; OW: overweight; OB: obesity.

**Table S1.** Associations between ALAN indicators and overweight and obesity for different tertiles of GDP per capita.

| Body weight measures | GDP per capita <sup>a</sup> | ALAN-area |               | ALAN-intensity |               |
|----------------------|-----------------------------|-----------|---------------|----------------|---------------|
|                      |                             | OR        | 95% CI        | OR             | 95% CI        |
| OW <sup>b</sup>      | Total                       | 1.144     | (1.124,1.165) | 1.014          | (1.012,1.017) |
|                      | 1st tertile                 | 1.432     | (1.301,1.577) | 1.040          | (1.030,1.050) |
|                      | 2nd tertile                 | 1.255     | (1.146,1.375) | 1.009          | (1.004,1.013) |
|                      | 3rd tertile                 | 1.066     | (1.045,1.088) | 1.000          | (0.997,1.003) |
| OB <sup>b</sup>      | Total                       | 1.322     | (1.292,1.352) | 1.030          | (1.026,1.033) |
|                      | 1st tertile                 | 1.554     | (1.311,1.842) | 1.021          | (1.003,1.040) |
|                      | 2nd tertile                 | 1.661     | (1.442,1.913) | 1.017          | (1.010,1.024) |
|                      | 3rd tertile                 | 1.177     | (1.147,1.208) | 1.006          | (1.002,1.011) |
| OW&OB <sup>b</sup>   | Total                       | 1.194     | (1.175,1.212) | 1.019          | (1.017,1.020) |
|                      | 1st tertile                 | 1.457     | (1.335,1.590) | 1.036          | (1.027,1.046) |
|                      | 2nd tertile                 | 1.350     | (1.245,1.464) | 1.011          | (1.007,1.015) |
|                      | 3rd tertile                 | 1.100     | (1.081,1.119) | 1.002          | (0.999,1.005) |

Note: <sup>a</sup> Tertiles of Regional gross domestic product per capita (US\$): 1st tertile = (2,559–6,318); 2nd tertile = (6,319–11,298); 3rd tertile = (11,299–32,306). <sup>b</sup> Adjusted for the fixed effect of age, sex, residence, sleep duration, exercise time, screen time, breakfast, eggs and milk intake, city-level population, and the clustering effect of school. OR: odds ratio; CI, confidence interval; ALAN: artificial light-at-night.

**Table S2.** Associations between ALAN indictors and overweight and obesity for different strata of GDP per capita according to the World Bank classification in 2013.

| Body weight measures | GDP per capita <sup>a</sup> | ALAN-area |               | ALAN-intensity |               |
|----------------------|-----------------------------|-----------|---------------|----------------|---------------|
|                      |                             | OR        | 95% CI        | OR             | 95% CI        |
| OW <sup>b</sup>      | Total                       | 1.144     | (1.124,1.165) | 1.014          | (1.012,1.017) |
|                      | Low middle income           | 1.625     | (1.380,1.913) | 1.035          | (1.022,1.048) |
|                      | Upper middle income         | 1.149     | (1.071,1.232) | 1.009          | (1.005,1.013) |
|                      | High income                 | 1.062     | (1.040,1.085) | 1.000          | (0.996,1.003) |
| OB <sup>b</sup>      | Total                       | 1.322     | (1.292,1.352) | 1.030          | (1.026,1.033) |
|                      | Low middle income           | 0.822     | (0.579,1.167) | 0.978          | (0.951,1.005) |
|                      | Upper middle income         | 1.559     | (1.393,1.744) | 1.023          | (1.017,1.029) |
|                      | High income                 | 1.155     | (1.123,1.187) | 1.002          | (0.997,1.007) |
| OW&OB <sup>b</sup>   | Total                       | 1.194     | (1.175,1.212) | 1.019          | (1.017,1.020) |
|                      | Low middle income           | 1.437     | (1.232,1.674) | 1.025          | (1.013,1.037) |
|                      | Upper middle income         | 1.239     | (1.164,1.320) | 1.013          | (1.009,1.016) |
|                      | High income                 | 1.091     | (1.071,1.111) | 1.000          | (0.997,1.003) |

Note: <sup>a</sup> Classification of Regional gross domestic product per capita (US\$): low middle income= (1,036–4,085); upper middle income = (4,086–12,616); High income >12,616. <sup>b</sup> Adjusted for the fixed effect of age, sex, residence, sleep duration, exercise time, screen time, breakfast, eggs and milk intake, city-level population, and the clustering effect of school. OR: odds ratio; CI, confidence interval; ALAN: artificial light-at-night.
